# Supplementary material for: Barriers to the Integration of Care in Inter-Organisational Settings: A Literature Review
Source: PubMed Central journal article supplement (PMC5887071; doi:10.5334/ijic.3068), 2018-01-16
Supplement: ijic-18-1-3068-s1.pdf [file ijic-18-1-3068-s1.pdf]

## APPENDIX

**Table 1: Matched search terms**

| Search term...:        | ... represents different forms of inter-organisational collaboration         | ... represents barriers                                                                          | ... represents integrated care settings                                                                                                                   | ... excludes other forms of networks                                                                 |
|------------------------|------------------------------------------------------------------------------|--------------------------------------------------------------------------------------------------|-----------------------------------------------------------------------------------------------------------------------------------------------------------|------------------------------------------------------------------------------------------------------|
| <i>Search terms</i>    | network*, consorti*, cluster*, alliance*, collabor*, cooperat*, partnership* | Barrier*, obstacl*, imped*, obstructi*, block*, inertia*, constrain*, problem*, inhibit*, rigid* | : "integrated care", "care coordinat*", "shared care", "coordinated care", "co-ordinated care", "comprehensive care", "seamless care", "transmural care". | inter-organisational, interorganisational, inter-organisational, inter-organisational, intersectoral |
| <i>Application to:</i> | Abstracts                                                                    | Abstracts                                                                                        | Abstracts                                                                                                                                                 | Full texts                                                                                           |

**Table 2: Studies included in the systematic review**

| No. | Study                        | Journal                           | Design      | Country  | Type of collaboration                                                                                             | Barriers described after coding                                                                                                                                        |
|-----|------------------------------|-----------------------------------|-------------|----------|-------------------------------------------------------------------------------------------------------------------|------------------------------------------------------------------------------------------------------------------------------------------------------------------------|
| 1   | Goldman 1982, [54]           | American Journal of Psychiatry    | Conceptual  | -        | Interorganisational cooperation between health and mental health services                                         | Different professionalisation; historical developments; resistance to change                                                                                           |
| 2   | Hudson et al. 1997, [55]     | Public Money & Management         | Qualitative | England  | Alliances between primary healthcare and social services                                                          | Cultural distance, different professionalisation; incompatible organisational structures; regulations                                                                  |
| 3   | Bourdages et al, 2003, [60]  | Health Promotion International    | Qualitative | Canada   | Collaboration of community stakeholders to set up integrated prevention programmes                                | Incompatible organisational structures; lack of leadership and coordination; missing actors                                                                            |
| 4   | Van Hook and Ford 1998, [66] | Health & Social Work              | Qualitative | U.S.     | Collaboration between mental health staff and community health organisations                                      | Different professionalisation; lack of leadership and coordination                                                                                                     |
| 5   | Curtice et al. 2003, [73]    | Journal of Interprofessional Care | Qualitative | Scotland | Collaboration between organizations providing health and social care                                              | Different professionalisation, lack of leadership and coordination; incompatible organisational structures; lack of trust; power imbalances and conflicts; regulations |
| 6   | Glendinning 2003, [9]        | Health Policy                     | Qualitative | England  | Collaborations between general practitioners and community health services and between health and social services | Different professionalisation; lack of organisational resources and external funding; power imbalances and conflicts; regulations; resistance to change                |

|    |                                         |                                               |             |                    |                                                                                                                                                         |                                                                                                                                                                                                                         |
|----|-----------------------------------------|-----------------------------------------------|-------------|--------------------|---------------------------------------------------------------------------------------------------------------------------------------------------------|-------------------------------------------------------------------------------------------------------------------------------------------------------------------------------------------------------------------------|
| 7  | Johnson et al. 2003, [56]               | Journal of Interprofessional Care             | Qualitative | Great Britain      | Collaboration between health and social care providers                                                                                                  | Different professionalisation; incompatible organisational structures; lack of leadership and coordination; lack of organisational resources and external funding; organisational vs. collective interests; regulations |
| 8  | Axelsson and Bihari-Axelsson 2005, [74] | Health Policy                                 | Qualitative | Russian Federation | Intersectoral collaboration between different organizations                                                                                             | Organisational vs. collective interests                                                                                                                                                                                 |
| 9  | Loisel et al. 2005, [65]                | Journal of Occupational Rehabilitation        | Qualitative | Canada             | Collaboration between an interdisciplinary and inter-organisational rehabilitation team                                                                 | Lack of mutual understanding                                                                                                                                                                                            |
| 10 | Poland et al. 2005; [75]                | Health & Social Care in the Community         | Qualitative | Canada             | Collaborations between communities and hospitals                                                                                                        | Cultural distance; lack of organisational resources and external funding; regulations                                                                                                                                   |
| 11 | Collins-Drogul 2006, [49]               | Social Science and Medicine                   | Qualitative | U.S., Mexico       | Collaboration between health organisations for providing cross-border healthcare                                                                        | National borders                                                                                                                                                                                                        |
| 12 | Dinesen et al. 2007, [61]               | International Journal of Integrated Care      | Qualitative | Denmark            | Collaboration between a hospital and community health professionals to provide tele-homecare                                                            | Differences regarding collaboration design and aims; different professionalisation                                                                                                                                      |
| 13 | Wihlman et al. 2008, [11]               | International Journal of Integrated Care      | Qualitative | Sweden             | Inter-organisational vocational rehabilitation project                                                                                                  | Different professionalisation; lack of communication; lack of leadership and coordination; organisational vs. collective interests                                                                                      |
| 14 | Axelsson and Axelsson 2009, [48]        | Journal of Interprofessional Care             | Qualitative | Sweden             | Collaboration mainly between the health services, the social services and the social insurance administration in the field of vocational rehabilitation | Different professionalisation; organisational vs. collective interests                                                                                                                                                  |
| 15 | Kendall et al. 2009, [76]               | Australian Journal of Primary Health          | Qualitative | Australia          | Regional collaborations of service providers to promote health                                                                                          | Former collaboration experiences; lack of organisational resources and external funding; organisational vs. collective interests                                                                                        |
| 16 | Wadman et al. 2009, [18]                | International Journal of Integrated Care      | Conceptual  | Sweden, Denmark    | Collaborations between primary and secondary healthcare                                                                                                 | Cultural distance; historical developments; lack of organisational resources and external funding; organisational vs. collective interests                                                                              |
| 17 | Hansson et al. 2010, [69]               | International Journal of Integrated Care      | Qualitative | Sweden             | Mental health coordination network                                                                                                                      | Lack of information exchange; lack of leadership and coordination                                                                                                                                                       |
| 18 | Pate et al. 2010, [51]                  | Journal of Health Organisation and Management | Mixed       | Scotland           | Partnerships within different networks having the character of mandated networks                                                                        | Different professionalisation                                                                                                                                                                                           |
| 19 | Rivas et al. 2010, [77]                 | International Journal of Integrated Care      | Qualitative | England            | Collaborations between primary and secondary care                                                                                                       | Organisational vs. collective interests                                                                                                                                                                                 |
| 20 | Stahl et al. 2010, [64]                 | Journal of Occupational Rehabilitation        | Qualitative | Sweden             | Inter-organisational collaboration between different agencies promoting return to work                                                                  | Lack of trust; organisational vs. collaborative interests                                                                                                                                                               |

|    |                             |                                                   |                   |             |                                                                                                                                                 |                                                                                                                                                                                                                                    |
|----|-----------------------------|---------------------------------------------------|-------------------|-------------|-------------------------------------------------------------------------------------------------------------------------------------------------|------------------------------------------------------------------------------------------------------------------------------------------------------------------------------------------------------------------------------------|
| 21 | Andersson et al. 2011, [12] | International Journal of Integrated Care          | Literature Review | -           | Collaboration between different agencies to enable vocational rehabilitation                                                                    | Differences regarding collaboration design and aim; different professionalisation; lack of communication, lack of leadership and coordination; lack of trust; missing actors; organisational vs. collective interests; regulations |
| 22 | Dinesen et al. 2011, [27]   | International Journal of Integrated Care          | Qualitative       | Denmark     | Collaboration between hospital, and community health professionals and firms to provide tele-rehabilitation                                     | Different professionalisation; incompatible organisational structures;                                                                                                                                                             |
| 23 | McDonald 2011, [78]         | Journal of Interprofessional Care                 | Qualitative       | Australia   | Collaborations across the public and private sector in diabetes care                                                                            | Cultural distance; incompatible organisational structures                                                                                                                                                                          |
| 24 | Stahl et al. 2011, [21]     | Journal of Occupational Rehabilitation            | Qualitative       | Sweden      | Inter-organisational collaboration between different agencies promoting return to work                                                          | Regulations                                                                                                                                                                                                                        |
| 25 | Widmark et al. 2011, [79]   | International Journal of Integrated Care          | Qualitative       | Sweden      | Collaboration among professionals in health care, social services, and schools when handling health issue related to children                   | Different professionalisation; incompatible organisational structures; lack of communication; lack of leadership and coordination; lack of organisational resources and external funding; lack of trust                            |
| 26 | Ling et al. 2012, [10]      | International Journal of Integrated Care          | Qualitative       | England     | Pilot projects of integrated care including different forms of inter-organisational collaboration                                               | Different professionalisation; lack of leadership and coordination; lack of technological standards; regulations; resistance to change                                                                                             |
| 27 | Stahl 2012, [80]            | Journal of Occupational Rehabilitation            | Qualitative       | Sweden      | Interprofessional teams working in interorganisational cooperation                                                                              | Lack of trust, organisational vs. collective interests                                                                                                                                                                             |
| 28 | Taylor-Robinson 2012, [81]  | PloS one                                          | Qualitative       | England     | Collaborations between different Primary Health Trust and Local Authorities                                                                     | Cultural distance; lack of communication; lack of mutual understanding; regulations                                                                                                                                                |
| 29 | Tsasis et al. 2012, [50]    | International Journal of Integrated Care          | Qualitative       | Canada      | Different models of integrated care; ranging from hierarchical to more collaborative models                                                     | Historical developments; lack of mutual understanding; lack of organisational resources and external funding; regulations                                                                                                          |
| 30 | Zou et al. 2012, [62]       | BMC Health Services Research                      | Qualitative       | China       | Collaboration between Centre for Disease Control and hospitals                                                                                  | Different professionalisation; organisational vs. collective interests                                                                                                                                                             |
| 31 | Kanste et al. 2013, [82]    | International Journal of Integrated Care          | Quantitative      | Finland     | Cooperation between health, welfare and education sectors serving children and families                                                         | Cultural distance; lack of leadership and coordination; lack of organisational resources and external funding                                                                                                                      |
| 32 | Anaf et al. 2014, [83]      | Australian & New Zealand Journal of Public Health | Qualitative       | New Zealand | Collaboration between primary health care organisations and organisations from other sectors (e.g. government, NGOs) to promote health outcomes | Lack of organisational resources and external funding; regulations                                                                                                                                                                 |
| 33 | Carter et al. 2014, [84]    | Implementation Science                            | Qualitative       | England     | Intra- and interorganisational collaboration for quality improvements in stroke care                                                            | Different professionalisation                                                                                                                                                                                                      |
| 34 | Whiteford et al. 2014, [25] | Australian & New Zealand Journal of Psychiatry    | Literature review | -           | System-level intersectoral linkages involving mental health services and non-clinical support services                                          | Confidentiality issues; lack of organisational resources and external funding; organisational vs. collective interests                                                                                                             |

|    |                             |                                                   |                   |         |                                                                                                                |                                                                                                                                                                                                                                              |
|----|-----------------------------|---------------------------------------------------|-------------------|---------|----------------------------------------------------------------------------------------------------------------|----------------------------------------------------------------------------------------------------------------------------------------------------------------------------------------------------------------------------------------------|
| 35 | Boothroyd et al. 2015, [47] | Journal of Behavioural Health Services & Research | Quantitative      | U.S.    | Collaboration between different professions, sectors and agencies in the field of children's mental health     | Differences regarding collaboration design and aims; former collaboration experience; lack of communication; lack of organisational resources and external funding, regulations                                                              |
| 36 | Bang Christensen 2016, [59] | International Journal of Integrated Care          | Qualitative       | Denmark | Collaboration between municipalities, GPs and hospitals in the context of a telecare service                   | Different professionalisation; incompatible organisational structures; lack of trust; power imbalances and conflicts                                                                                                                         |
| 37 | Cooper et al. 2016, [26]    | Child: Care, Health & Development                 | Literature review | -       | Interagency collaboration across mental health services for children and young people                          | Confidentiality issues; cultural distance; different professionalisation; lack of communication; lack of leadership and coordination; lack of mutual understanding; lack of organisational resources and external funding; lack of trust     |
| 38 | Lyngssø et al. 2016, [68]   | International Journal of Integrated Care          | Qualitative       | Denmark | Collaboration of healthcare professionals caring for patients with chronic obstructive pulmonary disease       | Cultural distance; lack of communication; lack of information exchange; lack of leadership and coordination; lack of technical standards                                                                                                     |
| 39 | Behruzi et al. 2017, [67]   | BMC Pregnancy & Childbirth                        | Qualitative       | Canada  | Interorganisational collaboration between midwives in birthing centres, and physicians and nurses in hospitals | Cultural distance; different professionalisation; incompatible organisational structures; lack of leadership; lack of organisational resources and external funding; organisational vs. collective interests; power imbalances and conflicts |
| 40 | McPherson et al. 2017, [58] | BMC Health Services Research                      | Qualitative       | Canada  | Cross-sectoral child health network                                                                            | Power imbalances and conflicts                                                                                                                                                                                                               |

## References

73. **Curtice, L, Stewart, A and Petch, A.** Moving towards integrated working in health and social care in Scotland: From maze to matrix. *Journal of Interprofessional Care*, 2003; 17(4): 335–50. DOI: <https://doi.org/10.1080/13561820310001608177>
74. **Axelsson, R and Bihari-Axelsson, S.** Intersectoral problems in the Russian organisation of public health. *Health Policy*, 2005; 73(3): 285–93. DOI: <https://doi.org/10.1016/j.healthpol.2004.11.020>
75. **Poland, B, Graham, H, Walsh, E, Williams, P, Fell, L, Lum, JM, et al.** 'Working at the margins' or 'leading from behind'? A Canadian study of hospital–community collaboration. *Health and Social Care in the Community*, 2005; 13(2): 125–35. DOI: <https://doi.org/10.1111/j.1365-2524.2005.00542.x>
76. **Kendall, E, Ehrlich, C, Young, M, Muenchberger, H, Wilkie, K and Rushton, C.** Health partnerships: Perspectives of medical practitioners in general practice, health systems and hospital settings. *Australian Journal of Primary Health*, 2009; 15(4): 319–25. DOI: <https://doi.org/10.1071/PY09018>
77. **Rivas, C, Abbott, S, Taylor, SJC, Clarke, A, Roberts, CM, Stone, R and Griffiths, C.** Collaborative working within UK NHS secondary care and across sectors for COPD and the impact of peer review: Qualitative findings from the UK National COPD Resources and Outcomes Project. *International Journal of Integrated Care*, 2010; 10(9): 1–13. DOI: <https://doi.org/10.5334/ijic.573>
78. **McDonald, J, Powell Davies, G, Jayasuriya, R and Fort Harris, M.** Collaboration across private and public sector primary health care services: Benefits, costs and policy implications. *Journal of Interprofessional Care*, 2011; 25(4): 258–64. DOI: <https://doi.org/10.3109/13561820.2011.566650>

79. **Widmark, C, Sandahl, C, Piuva, K and Bergman, D.** Barriers to collaboration between health care, social services and schools. *International Journal of Integrated Care*, 2011; 11(3): 1–9. DOI: <https://doi.org/10.5334/ijic.653>
80. **Stahl, C.** Implementing interorganizational cooperation in labour market reintegration: A case study. *Journal of Occupational Rehabilitation*, 2012; 22(2): 209–19. DOI: <https://doi.org/10.1007/s10926-011-9337-x>
81. **Taylor-Robinson, DC, Lloyd-Williams, F, Orton, L, Moonan, M, O’Flaherty, M and Capewell, S.** Barriers to partnership working in public health: A qualitative study. *PloS one*, 2012; 7(1): 1–8. DOI: <https://doi.org/10.1371/journal.pone.0029536>
82. **Kanste, O, Halme, N and Perälä, M-L.** Functionality of cooperation between health, welfare and education sectors serving children and families. *International Journal of Integrated Care*, 2013; 13(4): 1–15. DOI: <https://doi.org/10.5334/ijic.1070>
83. **Anaf, J, Baum, F, Freeman, T, Labonte, R, Javanparast, S, Jolley, G,** et al. Factors shaping intersectoral action in primary health care services. *Australian & New Zealand Journal of Public Health*, 2014; 38(6): 553–9. DOI: <https://doi.org/10.1111/1753-6405.12284>
84. **Carter, P, Ozieranski, P, McNicol, S, Power, M and Dixon-Woods, M.** How collaborative are quality improvement collaboratives: A qualitative study in stroke care. *Implementation Science*, 2014; 9(32): 1–11. DOI: <https://doi.org/10.1186/1748-5908-9-32>
